# Supplementary material
Source: PubMed Central journal article supplement (PMC5072412)
Supplement: mol-22-16_102_Chao_Suppl.pdf [file mol-22-16_102_Chao_Suppl.pdf]

Supplemental Data

**Cystathionine-β-Synthase Inhibition for Colon Cancer: Enhancement of the Efficacy of Aminooxyacetic Acid via the Prodrug Approach**

Celia Chao,<sup>1\*</sup> John R Zatarain,<sup>1\*</sup> Ye Ding,<sup>3\*</sup> Ciro Coletta,<sup>2†</sup> Amy A Mrazek,<sup>1</sup> Nadiya Druzhyina,<sup>2</sup> Paul Johnson,<sup>1</sup> Haiying Chen,<sup>3</sup> Judy L Hellmich,<sup>1</sup> Antonia Asimakopoulou,<sup>2</sup> Kazunori Yanagi,<sup>2</sup> Gabor Olah,<sup>2</sup> Petra Szoleczky,<sup>2</sup> Gabor Törö,<sup>2</sup> Fredrick J Bohanon,<sup>1</sup> Minal Cheema,<sup>1</sup> Rachel Lewis,<sup>1</sup> David Eckelbarger,<sup>1</sup> Akbar Ahmad,<sup>2</sup> Katalin Módis,<sup>1,2</sup> Ashley Untereiner,<sup>2</sup> Bartosz Szczesny,<sup>2</sup> Andreas Papapetropoulos,<sup>2</sup> Jia Zhou,<sup>3</sup> Mark R Hellmich,<sup>1</sup> and Csaba Szabo<sup>2</sup>

Online address: <http://www.molmed.org>

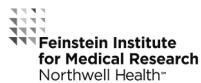

**Supplementary Table S1.** Modulation of the metabolome of HCT116 cells by YD0171 and AOAA treatment (1 mM, 24 h). Numbers represent fold changes in metabolite concentrations; red backgrounds indicate increases, green backgrounds indicate decreases in the concentration of the metabolite compared to control.

| Super Pathway                 | Sub Pathway                              | Analyte Name                       | AOAA vs. control | p      | YD0171 vs. control | p     |
|-------------------------------|------------------------------------------|------------------------------------|------------------|--------|--------------------|-------|
| Amino Acid                    | Glycine, Serine and Threonine Metabolism | glycine                            | 0.96             | 0.393  | 1.15               | 0.084 |
|                               |                                          | dimethylglycine                    | 1.06             | 0.602  | 1.26               | 0.017 |
|                               |                                          | betaine                            | 0.85             | 0.102  | 0.91               | 0.369 |
|                               |                                          | serine                             | 1.46             | <0.01  | 1.42               | 0.016 |
|                               |                                          | N-acetylserine                     | 0.61             | <0.01  | 0.9                | 0.182 |
|                               |                                          | threonine                          | 1.11             | 0.011  | 1.45               | <0.01 |
|                               |                                          | N-acetylthreonine                  | 0.89             | 0.086  | 0.79               | 0.020 |
|                               | Alanine and Aspartate Metabolism         | alanine                            | 0.62             | <0.01  | 0.8                | 0.016 |
|                               |                                          | N-acetylalanine                    | 0.63             | <0.01  | 0.59               | <0.01 |
|                               |                                          | aspartate                          | 0.37             | <0.01  | 0.36               | <0.01 |
|                               |                                          | asparagine                         | 1.1              | 0.025  | 1.48               | <0.01 |
|                               |                                          | N-acetylaspargine                  | 0.84             | 0.199  | 1.19               | 0.151 |
|                               | Glutamate Metabolism                     | N-acetylaspargine                  | 0.48             | <0.01  | 0.34               | <0.01 |
|                               |                                          | glutamate                          | 1.5              | <0.01  | 1.49               | <0.01 |
|                               |                                          | glutamine                          | 0.82             | <0.01  | 0.72               | <0.01 |
|                               |                                          | N-acetylglutamate                  | 0.96             | 0.7928 | 0.96               | 0.814 |
|                               |                                          | N-acetylglutamine                  | 0.76             | <0.01  | 1.01               | 0.966 |
|                               |                                          | N-acetyl-aspartyl-glutamate (NAAG) | 1.28             | 0.169  | 0.82               | 0.106 |
|                               |                                          | gamma-aminobutyrate (GABA)         | 0.26             | <0.01  | 0.31               | <0.01 |
|                               |                                          | 4-hydroxyglutamate                 | 4.82             | <0.01  | 2.49               | <0.01 |
| glutamate, gamma-methyl ester | 0.84                                     | 0.423                              | 0.41             | <0.01  |                    |       |
| pyroglutamine*                | 1.07                                     | 0.415                              | 1.19             | 0.084  |                    |       |
| S-1-pyrroline-5-carboxylate   | 5.7                                      | <0.01                              | 9.19             | <0.01  |                    |       |

Continued on the next page

Supplementary Table S1. *Continued.*

|                                           |                                   |       |       |       |        |
|-------------------------------------------|-----------------------------------|-------|-------|-------|--------|
| Histidine Metabolism                      | histidine                         | 1.13  | <0.01 | 1.24  | 0.025  |
|                                           | N-acetylhistidine                 | 0.67  | <0.01 | 0.68  | <0.01  |
|                                           | 1-methylhistidine                 | 1.19  | 0.036 | 1.77  | <0.01  |
|                                           | 3-methylhistidine                 | 1.16  | 0.052 | 2.21  | <0.01  |
|                                           | imidazole propionate              | 0.51  | <0.01 | 0.76  | 0.042  |
|                                           | imidazole lactate                 | 0.5   | <0.01 | 0.67  | <0.01  |
|                                           | 1-methylimidazoleacetate          | 1.19  | 0.079 | 1.57  | <0.01  |
|                                           | 4-imidazoleacetate                | 0.39  | <0.01 | 0.72  | 0.020  |
|                                           | histidine methyl ester            | 1.02  | 0.831 | 0.94  | 0.552  |
| Lysine Metabolism                         | lysine                            | 0.92  | 0.135 | 0.79  | 0.075  |
|                                           | N6-acetyllysine                   | 0.69  | 0.014 | 0.78  | 0.064  |
|                                           | N6,N6,N6-trimethyllysine          | 0.87  | 0.031 | 0.78  | 0.068  |
|                                           | 5-hydroxylysine                   | 1.6   | <0.01 | 1.29  | 0.220  |
|                                           | saccharopine                      | 1     |       | 1     |        |
|                                           | 2-aminoadipate                    | 2.69  | <0.01 | 2.4   | <0.01  |
|                                           | glutarate (pentanedioate)         | 0.64  | <0.01 | 1.23  | 0.072  |
|                                           | pipecolate                        | 1.67  | 0.018 | 1.67  | 0.029  |
|                                           | 5-aminovalerate                   | 0.56  | <0.01 | 0.49  | <0.01  |
|                                           | 6-oxopiperidine-2-carboxylic acid | 1.14  | 0.401 | 1.37  | 0.063  |
| Phenylalanine and Tyrosine Metabolism     | phenylalanine                     | 1.09  | 0.025 | 1.17  | 0.076  |
|                                           | N-acetylphenylalanine             | 0.66  | 0.186 | 1.15  | 0.7197 |
|                                           | phenyllactate (PLA)               | 0.42  | <0.01 | 0.54  | 0.033  |
|                                           | phenylacetyl glycine              | 1.25  | 0.017 | 1.32  | 0.033  |
|                                           | tyrosine                          | 1.16  | 0.012 | 1.23  | 0.065  |
|                                           | N-acetyltyrosine                  | 1     |       | 1     |        |
|                                           | 3-(4-hydroxyphenyl)lactate        | 0.08  | <0.01 | 0.14  | <0.01  |
|                                           | phenol sulfate                    | 0.91  | 0.295 | 0.97  | 0.652  |
|                                           | p-cresol sulfate                  | 0.98  | 0.770 | 1.05  | 0.605  |
| O-methyltyrosine                          | 1.39                              | <0.01 | 1.25  | 0.086 |        |
| Tryptophan Metabolism                     | tryptophan                        | 0.94  | 0.203 | 1.06  | 0.504  |
|                                           | indolelactate                     | 0.26  | <0.01 | 0.3   | <0.01  |
|                                           | kynurenine                        | 1.37  | <0.01 | 1.8   | <0.01  |
|                                           | serotonin                         | 1     |       | 1     |        |
|                                           | C-glycosyltryptophan              | 0.58  | <0.01 | 0.32  | 0.012  |
| Leucine, Isoleucine and Valine Metabolism | leucine                           | 1.06  | 0.064 | 1.21  | 0.042  |
|                                           | N-acetylleucine                   | 0.92  | 0.688 | 0.61  | 0.078  |
|                                           | 4-methyl-2-oxopentanoate          | 0.89  | 0.391 | 0.89  | 0.391  |
|                                           | isovalerylcarnitine               | 1.88  | <0.01 | 2.66  | <0.01  |
|                                           | beta-hydroxyisovalerate           | 0.29  | <0.01 | 0.27  | <0.01  |
|                                           | beta-hydroxyisovalerylcarnitine   | 0.26  | <0.01 | 0.26  | <0.01  |
|                                           | 3-methylglutaconate               | 0.57  | <0.01 | 0.75  | 0.177  |
|                                           | alpha-hydroxyisovalerate          | 1.12  | 0.391 | 1     |        |
|                                           | methylsuccinate                   | 0.62  | <0.01 | 0.95  | 0.608  |
|                                           | isoleucine                        | 1.35  | <0.01 | 1.68  | <0.01  |
|                                           | 3-methyl-2-oxovalerate            | 1     |       | 1     |        |
|                                           | 2-methylbutyrylcarnitine (C5)     | 0.92  | 0.145 | 1.36  | 0.013  |
|                                           | tiglylcarnitine                   | 0.15  | <0.01 | 0.15  | <0.01  |
|                                           | 2-hydroxy-3-methylvalerate        | 1     |       | 1     |        |
|                                           | ethylmalonate                     | 0.62  | <0.01 | 1.03  | 0.946  |
|                                           | valine                            | 1.16  | <0.01 | 1.22  | 0.067  |
|                                           | N-acetylvaline                    | 0.63  | <0.01 | 0.6   | <0.01  |
| 3-methyl-2-oxobutyrate                    | 1                                 |       | 1     |       |        |
| isobutyrylcarnitine                       | 0.71                              | <0.01 | 0.95  | 0.554 |        |
| 3-hydroxyisobutyrate                      | 0.49                              | <0.01 | 0.49  | <0.01 |        |
| alpha-hydroxyisocaproate                  | 1                                 |       | 1     |       |        |

*Continued on the next page*

Supplementary Table S1. *Continued.*

|                                                  |                                             |           |       |       |        |       |
|--------------------------------------------------|---------------------------------------------|-----------|-------|-------|--------|-------|
| Methionine, Cysteine, SAM and Taurine Metabolism | methionine                                  | 0.91      | 0.039 | 0.94  | 0.337  |       |
|                                                  | N-acetylmethionine                          | 0.78      | 0.011 | 0.7   | 0.014  |       |
|                                                  | N-formylmethionine                          | 0.82      | 0.036 | 1     | 0.908  |       |
|                                                  | methionine sulfone                          | 1.46      | <0.01 | 1.97  | <0.01  |       |
|                                                  | methionine sulfoxide                        | 1.78      | <0.01 | 1.99  | <0.01  |       |
|                                                  | N-acetylmethionine sulfoxide                | 4.28      | <0.01 | 3.09  | <0.01  |       |
|                                                  | S-adenosylmethionine (SAM)                  | 1.27      | <0.01 | 1.32  | 0.086  |       |
|                                                  | S-adenosylhomocysteine (SAH)                | 1.1       | 0.049 | 1.12  | 0.191  |       |
|                                                  | homocysteine                                | 1.41      | <0.01 | 1.44  | 0.028  |       |
|                                                  | cystathionine                               | 0.71      | 0.023 | 0.83  | 0.139  |       |
|                                                  | cysteine                                    | 0.67      | <0.01 | 0.69  | 0.100  |       |
|                                                  | N-acetylcysteine                            | 3.81      | <0.01 | 1.95  | 0.020  |       |
|                                                  | S-methylcysteine                            | 0.97      | 0.391 | 1.99  | 0.216  |       |
|                                                  | cysteine sulfinic acid                      | 7.95      | <0.01 | 8.68  | <0.01  |       |
|                                                  | hypotaurine                                 | 0.93      | 0.298 | 1.11  | 0.529  |       |
|                                                  | taurine                                     | 1.1       | 0.209 | 1.26  | 0.030  |       |
|                                                  | N-acetyltaurine                             | 0.54      | 0.042 | 0.92  | 0.575  |       |
|                                                  | 2-hydroxybutyrate/2-hydroxyisobutyrate      | 1         |       | 1     |        |       |
|                                                  | Urea cycle; Arginine and Proline Metabolism | arginine  | 1.12  | 0.016 | 1.03   | 0.825 |
|                                                  |                                             | ornithine | 5.34  | <0.01 | 5.1    | <0.01 |
| proline                                          |                                             | 1.47      | <0.01 | 1.92  | <0.01  |       |
| citrulline                                       |                                             | 2.45      | <0.01 | 2.33  | <0.01  |       |
| argininosuccinate                                |                                             | 0.11      | <0.01 | 0.22  | <0.01  |       |
| homoarginine                                     |                                             | 1.2       | 0.122 | 1.58  | 0.024  |       |
| homocitrulline                                   |                                             | 1.07      | 0.290 | 1.19  | 0.033  |       |
| dimethylarginine (SDMA + ADMA)                   |                                             | 0.73      | <0.01 | 0.58  | <0.01  |       |
| N-acetylarginine                                 |                                             | 0.95      | 0.709 | 0.8   | 0.102  |       |
| N-delta-acetylornithine                          |                                             | 1.19      | 0.059 | 1.49  | 0<0.01 |       |
| N-methylproline                                  |                                             | 0.79      | 0.310 | 0.88  | 0.627  |       |
| trans-4-hydroxyproline                           |                                             | 1.17      | 0.109 | 1.43  | <0.01  |       |
| pro-hydroxy-pro                                  |                                             | 1.01      | 0.962 | 0.92  | 0.404  |       |
| N-monomethylarginine                             |                                             | 1.13      | 0.033 | 0.94  | 0.562  |       |
| Creatine Metabolism                              | creatinine                                  | 1.13      | 0.04  | 1.19  | 0.024  |       |
|                                                  | creatinine                                  | 0.81      | <0.01 | 0.88  | 0.131  |       |
|                                                  | creatinine phosphate                        | 1.59      | <0.01 | 1.86  | <0.01  |       |
| Polyamine Metabolism                             | putrescine                                  | 0.08      | <0.01 | 0.1   | <0.01  |       |
|                                                  | spermine                                    | 44.41     | <0.01 | 30.22 | <0.01  |       |
|                                                  | N1,N12-diacetylspermine                     | 0.76      | <0.01 | 0.79  | 0.085  |       |
|                                                  | spermidine                                  | 6.46      | <0.01 | 2.67  | 0.024  |       |
|                                                  | 5-methylthioadenosine (MTA)                 | 0.95      | 0.367 | 1.28  | 0.089  |       |
|                                                  | N-acetylputrescine                          | 0.07      | <0.01 | 0.1   | <0.01  |       |
|                                                  | 4-acetamidobutanoate                        | 0.25      | <0.01 | 0.24  | <0.01  |       |
| Guanidino and Acetamido Metabolism               | 1-methylguanidine                           | 0.7       | 0.149 | 1.1   | 0.681  |       |
|                                                  | 4-guanidinobutanoate                        | 1         | 0.945 | 1.38  | <0.01  |       |
| Glutathione Metabolism                           | glutathione, reduced (GSH)                  | 1.31      | <0.01 | 1.34  | <0.01  |       |
|                                                  | glutathione, oxidized (GSSG)                | 1.27      | 0.067 | 1.36  | <0.01  |       |
|                                                  | cysteine-glutathione disulfide              | 0.35      | 0.027 | 0.43  | 0.086  |       |
|                                                  | S-methylglutathione                         | 2.31      | <0.01 | 2.26  | <0.01  |       |
|                                                  | S-lactoylglutathione                        | 1         |       | 1     |        |       |
|                                                  | cysteinylglycine                            | 0.76      | <0.01 | 0.88  | 0.205  |       |
|                                                  | 5-oxoproline                                | 1.08      | 0.087 | 1.43  | <0.01  |       |
|                                                  | ophthalmate                                 | 0.27      | <0.01 | 0.26  | <0.01  |       |
| S-nitrosoglutathione (GSNO)                      | 3                                           | 0.025     | 3.49  | 0.014 |        |       |

*Continued on the next page*

Supplementary Table S1. *Continued.*

|                 |                                                      |                                                                                                |           |       |       |        |
|-----------------|------------------------------------------------------|------------------------------------------------------------------------------------------------|-----------|-------|-------|--------|
| Peptide         | Gamma-glutamyl Amino Acid                            | gamma-glutamylalanine                                                                          | 0.55      | <0.01 | 0.69  | 0.017  |
|                 |                                                      | gamma-glutamylcysteine                                                                         | 1.61      | <0.01 | 1.35  | <0.01  |
|                 |                                                      | gamma-glutamylglutamate                                                                        | 2.76      | <0.01 | 2.51  | <0.01  |
|                 |                                                      | gamma-glutamylglutamine                                                                        | 0.9       | 0.27  | 0.71  | <0.01  |
|                 |                                                      | gamma-glutamylglycine                                                                          | 0.84      | 0.199 | 0.85  | 0.364  |
|                 |                                                      | gamma-glutamylhistidine                                                                        | 0.74      | 0.019 | 0.72  | 0.017  |
|                 |                                                      | gamma-glutamylisoleucine                                                                       | 1.84      | <0.01 | 1.9   | <0.01  |
|                 |                                                      | gamma-glutamylleucine                                                                          | 2.33      | <0.01 | 2.26  | <0.01  |
|                 |                                                      | gamma-glutamyl-epsilon-lysine                                                                  | 1.35      | 0.013 | 1.33  | 0.134  |
|                 |                                                      | gamma-glutamylmethionine                                                                       | 1.05      | 0.534 | 0.93  | 0.333  |
|                 |                                                      | gamma-glutamylphenylalanine                                                                    | 0.9       | 0.489 | 0.86  | 0.285  |
|                 |                                                      | gamma-glutamyltyrosine                                                                         | 1         |       | 1     |        |
|                 |                                                      | gamma-glutamylvaline                                                                           | 2.77      | <0.01 | 2.28  | <0.01  |
|                 |                                                      | Dipeptide Derivative                                                                           | carnosine | 0.99  | 0.893 | 1      |
|                 | homocarnosine                                        |                                                                                                | 1         |       | 1     |        |
|                 | anserine                                             |                                                                                                | 1         |       | 1     |        |
|                 | Dipeptide                                            | alanylleucine                                                                                  | 0.42      | <0.01 | 0.45  | <0.01  |
|                 |                                                      | glycylisoleucine                                                                               | 1.41      | 0.019 | 1.51  | 0.032  |
|                 |                                                      | glycylleucine                                                                                  | 1.18      | 0.057 | 1.48  | 0.051  |
|                 |                                                      | glycylvaline                                                                                   | 0.85      | 0.057 | 0.84  | 0.224  |
|                 |                                                      | isoleucylglycine                                                                               | 0.68      | <0.01 | 0.68  | <0.01  |
|                 |                                                      | leucylalanine                                                                                  | 2.07      | 0.206 | 0.73  | 0.315  |
|                 |                                                      | leucylglycine                                                                                  | 1.13      | 0.281 | 1.02  | 0.874  |
|                 |                                                      | phenylalanylalanine                                                                            | 0.48      | <0.01 | 0.52  | <0.01  |
|                 |                                                      | phenylalanylglycine                                                                            | 0.48      | <0.01 | 0.48  | <0.01  |
|                 |                                                      | prolylglutamine                                                                                | 1         | 0.877 | 1     | 0.897  |
|                 |                                                      | prolylglycine                                                                                  | 0.77      | <0.01 | 0.75  | 0.0155 |
|                 |                                                      | threonylphenylalanine                                                                          | 0.52      | 0.183 | 0.52  | 0.183  |
|                 |                                                      | tryptophylglycine                                                                              | 0.28      | <0.01 | 0.27  | <0.01  |
|                 |                                                      | tyrosylglycine                                                                                 | 0.8       | 0.028 | 0.76  | 0.058  |
| valylglutamine  |                                                      | 0.83                                                                                           | 0.218     | 0.63  | <0.01 |        |
| valylglycine    |                                                      | 1.17                                                                                           | 0.29      | 1.28  | 0.161 |        |
| valylleucine    | 0.67                                                 | 0.121                                                                                          | 0.47      | 0.021 |       |        |
| leucylglutamine | 1.34                                                 | 0.629                                                                                          | 0.61      | 0.060 |       |        |
| Carbohydrate    | Glycolysis, Gluconeogenesis, and Pyruvate Metabolism | glucose                                                                                        | 1.82      | <0.01 | 1.47  | 0.018  |
|                 |                                                      | glucose 6-phosphate                                                                            | 1.53      | <0.01 | 1.55  | <0.01  |
|                 |                                                      | fructose-6-phosphate                                                                           | 0.64      | 0.012 | 0.69  | 0.019  |
|                 |                                                      | Isobar: fructose 1,6-diphosphate, glucose 1,6-diphosphate, myo-inositol 1,4 or 1,3-diphosphate | 2.56      | <0.01 | 2.06  | <0.01  |
|                 |                                                      | 2,3-diphosphoglycerate                                                                         | 0.84      | 0.424 | 0.62  | 0.203  |
|                 |                                                      | dihydroxyacetone phosphate (DHAP)                                                              | 1.87      | 0.059 | 0.86  | 0.591  |
|                 |                                                      | 3-phosphoglycerate                                                                             | 1.89      | 0.139 | 2.36  | 0.018  |
|                 |                                                      | phosphoenolpyruvate (PEP)                                                                      | 3.07      | 0.022 | 3.31  | 0.017  |
|                 |                                                      | pyruvate                                                                                       | 4.91      | <0.01 | 3.83  | 0.083  |
|                 |                                                      | lactate                                                                                        | 0.53      | <0.01 | 0.62  | <0.01  |
|                 | glycerate                                            | 1.07                                                                                           | 0.304     | 0.85  | 0.353 |        |
|                 | Pentose Phosphate Pathway                            | 6-phosphogluconate                                                                             | 1.55      | 0.047 | 1.66  | 0.118  |
|                 |                                                      | ribose 1-phosphate                                                                             | 0.38      | 0.020 | 0.31  | 0.019  |
|                 |                                                      | 5-phosphoribosyl diphosphate (PRPP)                                                            | 3.42      | <0.01 | 1.22  | 0.195  |
|                 | Pentose Metabolism                                   | sedoheptulose-7-phosphate                                                                      | 1.77      | <0.01 | 2.08  | <0.01  |
|                 |                                                      | ribose                                                                                         | 1.28      | 0.022 | 1.3   | 0.028  |
|                 |                                                      | ribitol                                                                                        | 2.69      | <0.01 | 3.53  | <0.01  |
|                 |                                                      | ribonate                                                                                       | 0.63      | <0.01 | 0.79  | 0.108  |

Continued on the next page

Supplementary Table S1. *Continued.*

|        |                                            |                                                 |       |        |       |       |
|--------|--------------------------------------------|-------------------------------------------------|-------|--------|-------|-------|
|        |                                            | adenosine-5'-diphosphoglucose                   | 0.34  | <0.01  | 0.34  | <0.01 |
|        |                                            | arabitol/xylitol                                | 0.92  | 0.400  | 1.02  | 0.901 |
|        |                                            | ribulose/xylulose                               | 0.29  | 0.069  | 0.29  | 0.069 |
|        |                                            | arabonate/xylonate                              | 0.32  | 0.058  | 0.83  | 0.590 |
|        | Glycogen Metabolism                        | maltotriose                                     | 0.22  | <0.01  | 0.14  | <0.01 |
|        | Fructose, Mannose and Galactose Metabolism | fructose                                        | 5.1   | <0.015 | 5.22  | <0.01 |
|        |                                            | mannitol/sorbitol                               | 11.17 | <0.01  | 14.66 | <0.01 |
|        |                                            | galactitol (dulcitol)                           | 4.48  | <0.01  | 5.85  | <0.01 |
|        |                                            | galactonate                                     | 2.16  | 0.016  | 3.27  | <0.01 |
|        | Nucleotide Sugar                           | UDP-glucose                                     | 0.8   | <0.01  | 0.47  | <0.01 |
|        |                                            | UDP-galactose                                   | 0.62  | 0.042  | 0.47  | 0.044 |
|        |                                            | UDP-glucuronate                                 | 0.5   | <0.01  | 0.37  | <0.01 |
|        |                                            | guanosine 5'-diphospho-fucose                   | 1     |        | 1     |       |
|        |                                            | UDP-acetylglucosamine/galactosamine             | 5.89  | <0.01  | 4.21  | <0.01 |
|        |                                            | cytidine 5'-monophospho-N-acetylneuraminic acid | 0.89  | 0.371  | 0.84  | 0.207 |
|        |                                            | glucuronate 1-phosphate                         | 1.28  | <0.01  | 1.11  | 0.196 |
|        | Aminosugar Metabolism                      | glucuronate                                     | 1.06  | 0.572  | 0.94  | 0.655 |
|        |                                            | N-acetylglucosamine 6-phosphate                 | 1.34  | 0.540  | 0.65  | 0.492 |
|        |                                            | N-acetyl-glucosamine 1-phosphate                | 0.79  | 0.052  | 0.65  | 0.017 |
|        |                                            | N-acetylneuraminic acid                         | 0.94  | 0.197  | 0.81  | 0.101 |
|        |                                            | N-acetylglucosaminylasparagine                  | 1.01  | 0.995  | 0.75  | <0.01 |
|        |                                            | erythronate                                     | 0.56  | <0.01  | 0.64  | 0.017 |
|        |                                            | N-acetylglucosamine/N-acetylgalactosamine       | 1.27  | 0.030  | 0.9   | 0.310 |
| Energy | TCA Cycle                                  | citrate                                         | 1.52  | <0.01  | 1.95  | <0.01 |
|        |                                            | isocitrate                                      | 1.66  | <0.01  | 3.02  | <0.01 |
|        |                                            | alpha-ketoglutarate                             | 2.04  | <0.01  | 3.13  | <0.01 |
|        |                                            | succinylcarnitine                               | 0.38  | <0.01  | 0.38  | <0.01 |
|        |                                            | succinate                                       | 0.42  | <0.01  | 0.56  | <0.01 |
|        |                                            | fumarate                                        | 0.12  | <0.01  | 0.19  | <0.01 |
|        |                                            | malate                                          | 0.12  | <0.01  | 0.27  | <0.01 |
|        |                                            | 2-methylcitrate/homocitrate                     | 1.39  | 0.021  | 1.19  | 0.457 |
|        | Oxidative Phosphorylation                  | acetylphosphate                                 | 1.49  | 0.061  | 1.53  | 0.050 |
|        |                                            | phosphate                                       | 1.13  | <0.01  | 1.07  | 0.310 |
| Lipid  | Medium Chain Fatty Acid                    | caprate (10:0)                                  | 1.76  | <0.01  | 1.64  | <0.01 |
|        |                                            | laurate (12:0)                                  | 1.64  | <0.01  | 1.52  | 0.028 |
|        |                                            | 5-dodecenoate (12:1n7)                          | 2.36  | <0.01  | 2.29  | 0.037 |
|        | Long Chain Fatty Acid                      | myristate (14:0)                                | 0.97  | 0.856  | 1     | 0.752 |
|        |                                            | myristoleate (14:1n5)                           | 1.64  | <0.01  | 1.25  | 0.431 |
|        |                                            | pentadecanoate (15:0)                           | 1.5   | 0.037  | 1.76  | 0.275 |
|        |                                            | palmitate (16:0)                                | 1.17  | 0.231  | 1.2   | 0.775 |
|        |                                            | palmitoleate (16:1n7)                           | 1.38  | 0.053  | 1.36  | 0.552 |
|        |                                            | margarate (17:0)                                | 1.44  | 0.073  | 1.55  | 0.445 |
|        |                                            | 10-heptadecenoate (17:1n7)                      | 1.44  | 0.080  | 1.66  | 0.409 |
|        |                                            | stearate (18:0)                                 | 1.4   | 0.061  | 1.35  | 0.496 |
|        |                                            | nonadecanoate (19:0)                            | 1.14  | 0.368  | 1.25  | 0.891 |
|        |                                            | 10-nonadecenoate (19:1n9)                       | 1.06  | 0.620  | 1.16  | 0.993 |
|        |                                            | arachidate (20:0)                               | 0.56  | <0.01  | 0.66  | 0.193 |
|        |                                            | eicosenoate (20:1)                              | 0.7   | 0.173  | 0.76  | 0.325 |
|        |                                            | behenate (22:0)                                 | 0.65  | 0.058  | 0.78  | 0.35  |
|        |                                            | erucate (22:1n9)                                | 0.68  | 0.073  | 0.84  | 0.374 |
|        |                                            | oleate/vaccenate (18:1)                         | 1.18  | 0.230  | 1.28  | 0.703 |

*Continued on the next page*

Supplementary Table S1. *Continued.*

|                                              |                                            |                    |       |       |       |
|----------------------------------------------|--------------------------------------------|--------------------|-------|-------|-------|
| Polyunsaturated Fatty Acid (n3 and n6)       | stearidonate (18:4n3)                      | 3.11               | 0.138 | 2.64  | 0.151 |
|                                              | eicosapentaenoate (EPA; 20:5n3)            | 3.74               | <0.01 | 3.57  | 0.011 |
|                                              | docosapentaenoate (n3 DPA; 22:5n3)         | 2.06               | 0.018 | 2.32  | 0.135 |
|                                              | docosahexaenoate (DHA; 22:6n3)             | 1.99               | <0.01 | 2.24  | 0.103 |
|                                              | linoleate (18:2n6)                         | 2.07               | <0.01 | 2.13  | 0.136 |
|                                              | linolenate (alpha or gamma; (18:3n3 or 6)) | 2.15               | <0.01 | 2.02  | 0.094 |
|                                              | dihomo-linolenate (20:3n3 or n6)           | 2.06               | <0.01 | 2.32  | 0.097 |
|                                              | arachidonate (20:4n6)                      | 2.18               | <0.01 | 2.3   | 0.072 |
|                                              | adrenate (22:4n6)                          | 3.86               | 0.015 | 3.56  | 0.192 |
|                                              | docosapentaenoate (n6 DPA; 22:5n6)         | 1                  |       | 1     |       |
|                                              | docosadienoate (22:2n6)                    | 1.18               | 0.357 | 1.43  | 0.725 |
|                                              | dihomo-linoleate (20:2n6)                  | 1.17               | 0.357 | 1.37  | 0.668 |
|                                              | mead acid (20:3n9)                         | 2.34               | <0.01 | 2.4   | 0.070 |
|                                              | Fatty Acid, Branched                       | 13-methylmyristate | 1.09  | 0.668 | 1.31  |
| 15-methylpalmitate                           |                                            | 1.08               | 0.535 | 1.11  | 0.971 |
| 17-methylstearate                            |                                            | 0.79               | 0.228 | 0.89  | 0.481 |
| Fatty Acid, Dicarboxylate                    | 2-hydroxyglutarate                         | 0.63               | <0.01 | 0.9   | 0.340 |
|                                              | 2-hydroxyadipate                           | 0.75               | 0.391 | 0.75  | 0.39  |
|                                              | azelate (nonanedioate)                     | 4.51               | <0.01 | 1.28  | 0.856 |
| Fatty Acid, Keto                             | 1-dihomo-linoleoylglycerol (20:2)          | 0.32               | 0.022 | 0.55  | 0.189 |
| Fatty Acid Metabolism                        | acetyl CoA                                 | 4.9                | <0.01 | 2.43  | 0.030 |
|                                              | myristoyl CoA                              | 0.46               | <0.01 | 0.46  | <0.01 |
| Fatty Acid Metabolism (also BCAA Metabolism) | butyrylcarnitine                           | 0.88               | 0.135 | 1.22  | 0.211 |
|                                              | propionyl CoA                              | 0.1                | <0.01 | 0.28  | <0.01 |
|                                              | propionylcarnitine                         | 0.35               | <0.01 | 0.31  | <0.01 |
|                                              | methylmalonate (MMA)                       | 0.24               | <0.01 | 0.36  | <0.01 |
| Fatty Acid Metabolism (Acyl Glycine)         | N-palmitoyl glycine                        | 0.9                | 0.391 | 0.9   | 0.391 |
| Fatty Acid Metabolism (Acyl Carnitine)       | acetylcarnitine                            | 2.7                | <0.01 | 1.16  | 0.237 |
|                                              | 3-hydroxybutyrylcarnitine (1)              | 0.82               | 0.043 | 0.83  | 0.074 |
|                                              | 3-hydroxybutyrylcarnitine (2)              | 0.7                | <0.01 | 1.01  | 0.942 |
|                                              | hexanoylcarnitine                          | 0.45               | <0.01 | 0.41  | <0.01 |
|                                              | octanoylcarnitine                          | 0.73               | 0.224 | 0.72  | 0.214 |
|                                              | laurylcarnitine                            | 0.87               | 0.354 | 0.76  | 0.155 |
|                                              | myristoylcarnitine                         | 0.75               | 0.063 | 0.53  | <0.01 |
|                                              | palmitoylcarnitine                         | 1.31               | 0.084 | 0.87  | 0.406 |
|                                              | stearoylcarnitine                          | 6.34               | <0.01 | 4     | <0.01 |
|                                              | linoleoylcarnitine                         | 1                  |       | 1     |       |
|                                              | oleoylcarnitine                            | 1.52               | 0.020 | 0.99  | 0.897 |
| Carnitine Metabolism                         | deoxycarnitine                             | 0.5                | <0.01 | 0.56  | <0.01 |
|                                              | carnitine                                  | 0.94               | 0.382 | 0.95  | 0.476 |
| Ketone Bodies                                | 3-hydroxybutyrate (BHBA)                   | 2.47               | <0.01 | 2.29  | <0.01 |
| Fatty Acid, Monohydroxy                      | 4-hydroxybutyrate (GHB)                    | 0.42               | <0.01 | 0.46  | <0.01 |
|                                              | 2-hydroxypalmitate                         | 1.82               | <0.01 | 2.01  | 0.321 |
|                                              | 2-hydroxystearate                          | 2.38               | <0.01 | 2.31  | 0.121 |
|                                              | 3-hydroxyoctanoate                         | 0.97               | 0.391 | 0.97  | 0.391 |
|                                              | 3-hydroxylaurate                           | 0.37               | <0.01 | 0.27  | <0.01 |
| Endocannabinoid                              | oleoyl ethanolamide                        | 1.6                | <0.01 | 1.1   | 0.605 |
|                                              | palmitoyl ethanolamide                     | 1.19               | 0.109 | 1.09  | 0.320 |
|                                              | N-oleoyltaurine                            | 1                  |       | 1     |       |

Continued on the next page

Supplementary Table S1. *Continued.*

|                         |                                            |      |       |      |       |
|-------------------------|--------------------------------------------|------|-------|------|-------|
|                         | N-stearoyltaurine                          | 1.43 | 0.182 | 1.88 | 0.381 |
|                         | N-palmitoyltaurine                         | 1    |       | 1    |       |
| Inositol Metabolism     | myo-inositol                               | 3.69 | <0.01 | 4.22 | <0.01 |
|                         | inositol 1-phosphate (I1P)                 | 1.7  | <0.01 | 1.86 | <0.01 |
| Phospholipid Metabolism | choline                                    | 1.64 | <0.01 | 1.66 | <0.01 |
|                         | choline phosphate                          | 1.48 | <0.01 | 1.59 | <0.01 |
|                         | cytidine 5'-diphosphocholine               | 1.15 | 0.264 | 0.82 | 0.118 |
|                         | glycerophosphorylcholine (GPC)             | 1.27 | <0.01 | 1.37 | 0.039 |
|                         | phosphoethanolamine                        | 2.55 | <0.01 | 2.56 | <0.01 |
|                         | cytidine-5'-diphosphoethanolamine          | 0.58 | <0.01 | 0.58 | <0.01 |
|                         | glycerophosphoethanolamine                 | 0.66 | <0.01 | 0.83 | 0.108 |
|                         | glycerophosphoinositol                     | 1    | 0.954 | 1.16 | 0.363 |
|                         | 1,2-dipalmitoyl-GPC (16:0/16:0)            | 0.73 | <0.01 | 0.69 | <0.01 |
|                         | 1-palmitoyl-2-oleoyl-GPC (16:0/18:1)       | 1.23 | <0.01 | 1.13 | 0.139 |
|                         | 1-stearoyl-2-arachidonoyl-GPC (18:0/20:4)  | 4.42 | <0.01 | 3.79 | <0.01 |
|                         | 1-palmitoyl-2-linoleoyl-GPC (16:0/18:2)    | 1.52 | <0.01 | 1.38 | <0.01 |
|                         | 1-stearoyl-2-oleoyl-GPC (18:0/18:1)        | 1.25 | <0.01 | 1.12 | 0.179 |
|                         | 1-stearoyl-2-oleoyl-GPI (18:0/18:1)        | 1.5  | <0.01 | 1.62 | <0.01 |
|                         | 1,2-dioleoyl-GPC (18:1/18:1)               | 1.07 | 0.188 | 0.97 | 0.635 |
|                         | 1-palmitoyl-2-arachidonoyl-GPC (16:0/20:4) | 3.04 | <0.01 | 2.49 | <0.01 |
|                         | 1-stearoyl-2-linoleoyl-GPC (18:0/18:2)     | 1.22 | 0.659 | 1.24 | 0.657 |
|                         | 1-palmitoleoyl-2-oleoyl-GPC (16:1/18:1)    | 1.21 | <0.01 | 1.11 | 0.270 |
|                         | 1-palmitoyl-2-palmitoleoyl-GPC (16:0/16:1) | 1.15 | 0.024 | 1.05 | 0.536 |
|                         | 1,2-dipalmitoleoyl-GPC (16:1/16:1)         | 1.32 | <0.01 | 1.09 | 0.360 |
|                         | 1-stearoyl-2-arachidonoyl-GPI (18:0/20:4)  | 2.43 | <0.01 | 2.42 | <0.01 |
|                         | 1-oleoyl-2-linoleoyl-GPC (18:1/18:2)       | 1.67 | <0.01 | 1.6  | <0.01 |
|                         | 1-palmitoyl-2-oleoyl-GPG (16:0/18:1)       | 0.38 | <0.01 | 0.33 | <0.01 |
|                         | 1-palmitoyl-2-oleoyl-GPE (16:0/18:1)       | 1.15 | 0.036 | 1.01 | 0.870 |
|                         | 1-stearoyl-2-arachidonoyl-GPE (18:0/20:4)  | 2.12 | <0.01 | 1.88 | <0.01 |
|                         | 1-stearoyl-2-oleoyl-GPE (18:0/18:1)        | 1.25 | <0.01 | 1.12 | 0.167 |
|                         | 1-palmitoyl-2-arachidonoyl-GPE (16:0/20:4) | 1.82 | <0.01 | 1.45 | <0.01 |
|                         | 1-palmitoyl-2-linoleoyl-GPE (16:0/18:2)    | 1.12 | 0.880 | 1.41 | 0.283 |
|                         | 1-stearoyl-2-linoleoyl-GPE (18:0/18:2)     | 1.66 | <0.01 | 1.43 | 0.013 |
|                         | 1,2-dioleoyl-GPG (18:1/18:1)               | 0.61 | <0.01 | 0.68 | <0.01 |
|                         | 1,2-dioleoyl-GPI (18:1/18:1)               | 1.05 | 0.401 | 0.96 | 0.604 |
|                         | 1-palmitoyl-2-stearoyl-GPC (16:0/18:0)     | 0.53 | <0.01 | 0.5  | <0.01 |
|                         | 1,2-dioleoyl-GPE (18:1/18:1)               | 1.01 | 0.834 | 0.87 | 0.085 |
|                         | 1-palmitoyl-2-oleoyl-GPI (16:0/18:1)       | 1.72 | <0.01 | 1.58 | <0.01 |
|                         | 1,2-dioleoyl-GPS (18:1/18:1)               | 1.54 | <0.01 | 1.49 | <0.01 |
|                         | 1-stearoyl-2-oleoyl-GPG (18:0/18:1)        | 1.65 | <0.01 | 1.61 | <0.01 |
|                         | 1-palmitoyl-2-linolenoyl-GPC (16:0/18:3)   | 1.34 | <0.01 | 1.14 | 0.297 |
|                         | 1-palmitoleoyl-2-linoleoyl-GPC (16:1/18:2) | 1.88 | <0.01 | 1.55 | <0.01 |
|                         | 1,2-dilinoeoyl-GPC (18:2/18:2)             | 1.99 | <0.01 | 1.73 | <0.01 |
|                         | 1-oleoyl-2-linoleoyl-GPE (18:1/18:2)*      | 1.3  | <0.01 | 1.1  | 0.282 |
|                         | 1,2-distearoyl-GPC (18:0/18:0)             | 0.14 | <0.01 | 0.11 | <0.01 |
|                         | 1-palmitoyl-2-oleoyl-GPS (16:0/18:1)       | 1.57 | <0.01 | 1.52 | <0.01 |
|                         | 1-stearoyl-2-linoleoyl-GPS (18:0/18:2)     | 1.59 | <0.01 | 1.33 | 0.028 |
| Phosphatidylserine (PS) | 1-stearoyl-2-arachidonoyl-GPS (18:0/20:4)  | 1.43 | <0.01 | 1.12 | 0.263 |
|                         | 1-stearoyl-2-oleoyl-GPS (18:0/18:1)        | 3.61 | <0.01 | 3.71 | <0.01 |
| Lysolipid               | 1-palmitoyl-GPC (16:0)                     | 0.93 | 0.200 | 0.84 | 0.046 |
|                         | 2-palmitoyl-GPC (16:0)*                    | 1.15 | 0.421 | 1.12 | 0.999 |
|                         | 1-palmitoleoyl-GPC (16:1)                  | 1.13 | 0.114 | 0.95 | 0.533 |
|                         | 2-palmitoleoyl-GPC (16:1)                  | 1.19 | 0.155 | 1.54 | 0.786 |
|                         | 1-stearoyl-GPC (18:0)                      | 1.2  | 0.062 | 1.1  | 0.238 |

Continued on the next page

Supplementary Table S1. *Continued.*

|                  |                                                       |      |        |      |        |
|------------------|-------------------------------------------------------|------|--------|------|--------|
|                  | 1-oleoyl-GPC (18:1)                                   | 0.99 | 0.844  | 0.86 | 0.092  |
|                  | 1-linoleoyl-GPC (18:2)                                | 1.58 | 0.0172 | 1.35 | <0.01  |
|                  | 1-arachidonoyl-GPC (20:4n6)                           | 2.26 | <0.01  | 2.58 | 0.2057 |
|                  | 1-lignoceroyl-GPC (24:0)                              | 0.63 | 0.014  | 0.48 | <0.01  |
|                  | 1-palmitoyl-GPE (16:0)                                | 1.73 | 0.748  | 2.15 | 0.615  |
|                  | 1-stearoyl-GPE (18:0)                                 | 0.98 | 0.743  | 0.81 | 0.025  |
|                  | 2-stearoyl-GPE (18:0)                                 | 1.05 | 0.817  | 1.12 | 0.649  |
|                  | 1-oleoyl-GPE (18:1)                                   | 1.36 | 0.782  | 1.99 | 0.646  |
|                  | 1-linoleoyl-GPE (18:2)                                | 2.78 | 0.068  | 2.55 | 0.207  |
|                  | 1-arachidonoyl-GPE (20:4n6)                           | 2.59 | <0.01  | 2.87 | 0.070  |
|                  | 1-palmitoyl-GPI (16:0)                                | 1.07 | 0.612  | 1.34 | 0.988  |
|                  | 1-stearoyl-GPI (18:0)                                 | 0.96 | 0.860  | 1.49 | 0.847  |
|                  | 1-oleoyl-GPI (18:1)                                   | 0.61 | 0.017  | 0.66 | 0.182  |
|                  | 1-linoleoyl-GPI (18:2)                                | 0.66 | 0.027  | 0.87 | 0.4191 |
|                  | 1-arachidonoyl-GPI (20:4)                             | 1.29 | 0.154  | 1.36 | 0.592  |
|                  | 1-stearoyl-GPS (18:0)                                 | 0.63 | 0.101  | 1.06 | 0.533  |
|                  | 1-oleoyl-GPS (18:1)                                   | 1.4  | 0.067  | 1.6  | 0.557  |
|                  | 1-palmitoyl-GPG (16:0)                                | 0.62 | 0.072  | 0.84 | 0.436  |
|                  | 1-palmitoyl-GPS (16:0)                                | 0.18 | <0.01  | 0.25 | 0.04   |
|                  | 1-stearoyl-GPG (18:0)                                 | 0.55 | 0.139  | 0.6  | 0.234  |
|                  | 1-oleoyl-GPG (18:1)                                   | 1.03 | 0.712  | 1.37 | 0.515  |
| Plasmalogen      | 1-(1-enyl-palmitoyl)-2-oleoyl-GPE (P-16:0/18:1)       | 0.93 | 0.076  | 0.86 | 0.064  |
|                  | 1-(1-enyl-palmitoyl)-2-linoleoyl-GPE (P-16:0/18:2)    | 1.16 | 0.066  | 1.1  | 0.164  |
|                  | 1-(1-enyl-palmitoyl)-2-palmitoyl-GPC (P-16:0/16:0)    | 0.59 | <0.01  | 0.54 | <0.01  |
|                  | 1-(1-enyl-palmitoyl)-2-palmitoleoyl-GPC (P-16:0/16:1) | 0.73 | <0.01  | 0.65 | 0.0129 |
|                  | 1-(1-enyl-palmitoyl)-2-arachidonoyl-GPE (P-16:0/20:4) | 1.52 | <0.01  | 1.41 | <0.01  |
|                  | 1-(1-enyl-palmitoyl)-2-oleoyl-GPC (P-16:0/18:1)       | 0.63 | <0.01  | 0.57 | <0.01  |
|                  | 1-(1-enyl-stearoyl)-2-oleoyl-GPE (P-18:0/18:1)        | 0.7  | <0.01  | 0.64 | <0.01  |
|                  | 1-(1-enyl-palmitoyl)-2-arachidonoyl-GPC (P-16:0/20:4) | 3.85 | <0.01  | 3.75 | <0.01  |
|                  | 1-(1-enyl-palmitoyl)-2-linoleoyl-GPC (P-16:0/18:2)    | 1    | 0.935  | 1.08 | 0.542  |
|                  | 1-(1-enyl-stearoyl)-2-arachidonoyl-GPE (P-18:0/20:4)  | 1.21 | <0.01  | 1.2  | 0.078  |
| Lysoplasmalogen  | 1-(1-enyl-palmitoyl)-GPC (P-16:0)*                    | 0.91 | 0.239  | 0.82 | 0.132  |
|                  | 1-(1-enyl-palmitoyl)-GPE (P-16:0)*                    | 0.64 | <0.01  | 0.55 | <0.01  |
|                  | 1-(1-enyl-oleoyl)-GPE (P-18:1)*                       | 0.82 | 0.175  | 1.55 | 0.978  |
|                  | 1-(1-enyl-stearoyl)-GPE (P-18:0)*                     | 0.64 | 0.033  | 0.91 | 0.430  |
| Glycerolipid     | glycerol                                              | 0.8  | 0.033  | 0.78 | 0.070  |
| Metabolism       | glycerol 3-phosphate                                  | 2.65 | <0.01  | 3.41 | <0.01  |
|                  | glycerophosphoglycerol                                | 0.31 | <0.01  | 0.4  | <0.01  |
| Monoacylglycerol | 1-myristoylglycerol (14:0)                            | 0.68 | 0.014  | 0.73 | 0.240  |
|                  | 2-myristoylglycerol (14:0)                            | 0.39 | <0.01  | 0.5  | 0.100  |
|                  | 1-pentadecanoylglycerol (15:0)                        | 1.06 | 0.804  | 0.89 | 0.528  |
|                  | 1-palmitoylglycerol (16:0)                            | 0.77 | 0.407  | 0.51 | 0.117  |
|                  | 2-palmitoylglycerol (16:0)                            | 0.29 | <0.01  | 0.36 | 0.052  |
|                  | 1-margaroylglycerol (17:0)                            | 0.57 | 0.205  | 0.42 | 0.059  |
|                  | 1-oleoylglycerol (18:1)                               | 0.84 | 0.554  | 0.8  | 0.418  |
|                  | 2-oleoylglycerol (18:1)                               | 0.48 | 0.018  | 0.59 | 0.160  |
|                  | 1-linoleoylglycerol (18:2)                            | 1.16 | 0.386  | 1.01 | 0.794  |
|                  | 2-linoleoylglycerol (18:2)                            | 0.73 | 0.353  | 0.77 | 0.4239 |
|                  | 1-arachidonoylglycerol (20:4)                         | 1.53 | 0.062  | 1.38 | 0.770  |
|                  | 2-arachidonoylglycerol (20:4)                         | 0.99 | 0.945  | 0.95 | 0.572  |
|                  | 1-docosahexaenoylglycerol (22:6)                      | 1.47 | 0.078  | 1.56 | 0.593  |
|                  | 2-docosahexaenoylglycerol (22:6)                      | 0.87 | 0.971  | 1.15 | 0.805  |
|                  | 1-palmitoleoylglycerol (16:1)                         | 0.72 | 0.122  | 0.68 | 0.223  |
|                  | 2-palmitoleoylglycerol (16:1)                         | 0.45 | <0.01  | 0.57 | 0.133  |

*Continued on the next page*



Supplementary Table S1. *Continued.*

|                                                    |                                                             |                                   |       |       |       |       |
|----------------------------------------------------|-------------------------------------------------------------|-----------------------------------|-------|-------|-------|-------|
| Diacylglycerol                                     | 1-oleoyl-3-linoleoyl-glycerol (18:1/18:2)                   | 1.09                              | 0.815 | 0.71  | 0.047 |       |
|                                                    | 1-palmitoleoyl-3-oleoyl-glycerol (16:1/18:1)                | 0.78                              | <0.01 | 0.62  | <0.01 |       |
|                                                    | 1-palmitoyl-3-linoleoyl-glycerol (16:0/18:2)                | 1.09                              | 0.276 | 0.88  | 0.159 |       |
| Sphingolipid<br>Metabolism                         | N-palmitoyl-sphinganine (d18:0/16:0)                        | 0.92                              | 0.258 | 0.53  | 0.015 |       |
|                                                    | sphinganine                                                 | 0.5                               | <0.01 | 0.41  | <0.01 |       |
|                                                    | phytosphingosine                                            | 0.8                               | 0.055 | 0.81  | 0.081 |       |
|                                                    | palmitoyl sphingomyelin (d18:1/16:0)                        | 1.69                              | <0.01 | 1.48  | <0.01 |       |
|                                                    | stearoyl sphingomyelin (d18:1/18:0)                         | 1.55                              | <0.01 | 1.39  | 0.022 |       |
|                                                    | sphingomyelin (d18:1/18:1, d18:2/18:0)                      | 1.43                              | <0.01 | 1.57  | 0.019 |       |
|                                                    | sphingosine                                                 | 1.13                              | 0.053 | 0.99  | 0.820 |       |
|                                                    | N-palmitoyl-sphingosine (d18:1/16:0)                        | 2.38                              | <0.01 | 2.15  | <0.01 |       |
|                                                    | sphingomyelin (d18:1/14:0, d16:1/16:0)                      | 1.55                              | <0.01 | 1.31  | 0.025 |       |
|                                                    | sphingomyelin (d18:2/14:0, d18:1/14:1)                      | 1.41                              | <0.01 | 1.09  | 0.333 |       |
|                                                    | sphingomyelin (d18:1/24:1, d18:2/24:0)                      | 1.48                              | <0.01 | 1.32  | 0.034 |       |
|                                                    | sphingomyelin (d18:2/16:0, d18:1/16:1)                      | 1.22                              | 0.016 | 1.02  | 0.898 |       |
|                                                    | sphingomyelin (d18:1/20:1, d18:2/20:0)                      | 1.17                              | 0.156 | 1.15  | 0.243 |       |
|                                                    | behenoyl sphingomyelin (d18:1/22:0)                         | 1.17                              | 0.036 | 1.04  | 0.529 |       |
|                                                    | sphingomyelin (d18:1/22:1, d18:2/22:0, d16:1/24:1)          | 1.22                              | 0.014 | 1.09  | 0.466 |       |
|                                                    | sphingomyelin (d18:1/20:0, d16:1/22:0)                      | 1.27                              | 0.015 | 1.06  | 0.535 |       |
|                                                    | palmitoyl dihydrosphingomyelin (d18:0/16:0)                 | 0.64                              | <0.01 | 0.51  | <0.01 |       |
|                                                    | sphingomyelin (d18:1/15:0, d16:1/17:0)                      | 1.12                              | 0.192 | 0.95  | 0.427 |       |
|                                                    | sphingomyelin (d18:1/21:0, d17:1/22:0, d16:1/23:0)          | 0.84                              | 0.073 | 0.73  | 0.136 |       |
|                                                    | sphingomyelin (d18:2/23:0, d18:1/23:1, d17:1/24:1)          | 1.39                              | <0.01 | 1.25  | 0.079 |       |
|                                                    | sphingomyelin (d18:2/24:1, d18:1/24:2)                      | 1.53                              | <0.01 | 1.25  | <0.01 |       |
| tricosanoyl sphingomyelin (d18:1/23:0)             | 0.99                                                        | 0.843                             | 0.92  | 0.347 |       |       |
| sphingomyelin (d18:1/17:0, d17:1/18:0, d19:1/16:0) | 1.83                                                        | <0.01                             | 1.59  | <0.01 |       |       |
| glycosyl-N-stearoyl-sphingosine                    | 3.53                                                        | <0.01                             | 1.92  | 0.128 |       |       |
| glycosyl-N-palmitoyl-sphingosine                   | 1.58                                                        | <0.01                             | 1.44  | <0.01 |       |       |
| lactosyl-N-palmitoyl-sphingosine                   | 2.33                                                        | <0.01                             | 2.09  | <0.01 |       |       |
| Mevalonate<br>Metabolism                           | 3-hydroxy-3-methylglutarate                                 | 1.62                              | <0.01 | 1.55  | <0.01 |       |
| Sterol                                             | cholesterol                                                 | 1.06                              | 0.554 | 0.97  | 0.678 |       |
|                                                    | 7-hydroxycholesterol (alpha or beta)                        | 1.24                              | 0.324 | 1.03  | 0.835 |       |
| Primary Bile Acid<br>Metabolism                    | cholate                                                     | 2.29                              | <0.01 | 1.9   | <0.01 |       |
|                                                    | glycocholate                                                | 1.77                              | <0.01 | 1.58  | 0.031 |       |
|                                                    | taurocholate                                                | 1.66                              | <0.01 | 1.41  | 0.069 |       |
|                                                    | glycochenodeoxycholate                                      | 2                                 | <0.01 | 2.05  | <0.01 |       |
|                                                    | taurochenodeoxycholate                                      | 1.97                              | <0.01 | 1.63  | 0.070 |       |
| Secondary Bile Acid<br>Metabolism                  | deoxycholate                                                | 1.58                              | 0.014 | 1.69  | <0.01 |       |
|                                                    | glycodeoxycholate                                           | 1.53                              | 0.011 | 1.43  | 0.176 |       |
|                                                    | taurodeoxycholate                                           | 1.55                              | 0.031 | 1.47  | 0.139 |       |
| Nucleotide                                         | Purine Metabolism,<br>(Hypo)Xanthine/<br>Inosine containing | AICA ribonucleotide               | 2.25  | <0.01 | 0.35  | <0.01 |
|                                                    |                                                             | inosine 5'-monophosphate (IMP)    | 1     | 0.852 | 0.68  | 0.160 |
|                                                    |                                                             | inosine                           | 0.76  | 0.010 | 0.81  | 0.012 |
|                                                    |                                                             | hypoxanthine                      | 0.78  | <0.01 | 0.7   | 0.011 |
|                                                    |                                                             | xanthine                          | 2.56  | <0.01 | 1.97  | <0.01 |
|                                                    |                                                             | xanthosine 5'-monophosphate (xmp) | 1.45  | 0.058 | 0.7   | 0.159 |
|                                                    |                                                             | xanthosine                        | 0.49  | 0.020 | 0.2   | 0.021 |
|                                                    |                                                             | 2'-deoxyinosine                   | 0.34  | <0.01 | 0.28  | <0.01 |
|                                                    |                                                             | urate                             | 1.9   | <0.01 | 2.76  | <0.01 |
|                                                    |                                                             | allantoin                         | 0.96  | 0.670 | 1.1   | 0.536 |
| Purine Metabolism,<br>Adenine containing           | adenosine 5'-diphosphate (ADP)                              | 1.08                              | 0.632 | 1.49  | 0.039 |       |
|                                                    | adenosine 5'-monophosphate (AMP)                            | 0.66                              | <0.01 | 0.7   | <0.01 |       |
|                                                    | adenosine 3'-monophosphate (3'-AMP)                         | 0.54                              | 0.071 | 0.59  | 0.078 |       |

Continued on the next page

Supplementary Table S1. *Continued.*

|                        |                |                                             |       |       |       |        |
|------------------------|----------------|---------------------------------------------|-------|-------|-------|--------|
|                        |                | adenosine 2'-monophosphate (2'-AMP)         | 0.12  | <0.01 | 0.11  | <0.01  |
|                        |                | adenosine 3',5'-cyclic monophosphate (cAMP) | 0.47  | <0.01 | 0.67  | 0.0367 |
|                        |                | adenosine 3',5'-diphosphate                 | 0.25  | <0.01 | 0.2   | <0.01  |
|                        |                | adenylosuccinate                            | 0.03  | <0.01 | 0.07  | <0.01  |
|                        |                | adenosine                                   | 3.44  | <0.01 | 2.04  | <0.01  |
|                        |                | adenine                                     | 2.44  | <0.01 | 2.18  | <0.01  |
|                        |                | N1-methyladenosine                          | 0.97  | 0.720 | 0.71  | 0.225  |
|                        |                | N6-methyladenosine                          | 19.72 | <0.01 | 42.94 | <0.01  |
|                        |                | N6-carbamoylthreonyladenosine               | 1.52  | <0.01 | 1.25  | 0.103  |
|                        |                | 2'-deoxyadenosine 5'-monophosphate          | 1.1   | 0.301 | 0.91  | 0.255  |
|                        |                | 2'-deoxyadenosine                           | 0.67  | 0.278 | 0.63  | 0.222  |
|                        |                | diadenosine triphosphate                    | 1     |       | 1     |        |
|                        |                | N6-succinyladenosine                        | 0.12  | <0.01 | 0.15  | <0.01  |
| Purine Metabolism,     |                | guanosine 5'-triphosphate                   | 14.6  | <0.01 | 8.5   | <0.01  |
| Guanine containing     |                | guanosine 5'- diphosphate (GDP)             | 10.89 | <0.01 | 6.85  | <0.01  |
|                        |                | guanosine 5'- monophosphate (5'-GMP)        | 1.4   | <0.01 | 1.17  | 0.121  |
|                        |                | guanosine                                   | 2.12  | 0.014 | 1.48  | <0.01  |
|                        |                | guanine                                     | 5.82  | <0.01 | 2.43  | <0.01  |
|                        |                | 7-methylguanine                             | 0.99  | 0.898 | 0.93  | 0.384  |
|                        |                | N2,N2-dimethylguanosine                     | 1.02  | 0.832 | 0.71  | 0.043  |
|                        |                | 2'-deoxyguanosine 5'-monophosphate (dGMP)   | 1.18  | 0.358 | 0.69  | 0.026  |
|                        |                | 2'-deoxyguanosine                           | 0.39  | <0.01 | 0.29  | <0.01  |
| Pyrimidine Metabolism, |                | orotate                                     | 0.74  | 0.146 | 1.29  | 0.567  |
| Orotate containing     |                | orotidine                                   | 0.37  | <0.01 | 0.23  | <0.01  |
| Pyrimidine Metabolism, |                | uridine 5'-triphosphate (UTP)               | 4.73  | <0.01 | 2.76  | <0.01  |
| Uracil containing      |                | uridine 5'-diphosphate (UDP)                | 3.3   | <0.01 | 1.88  | <0.01  |
|                        |                | uridine 5'-monophosphate (UMP)              | 0.52  | <0.01 | 0.34  | <0.01  |
|                        |                | uridine 3'-monophosphate (3'-UMP)           | 0.72  | <0.01 | 0.54  | 0.163  |
|                        |                | uridine-2',3'-cyclic monophosphate          | 1.04  | 0.391 | 1     |        |
|                        |                | uridine                                     | 1.09  | 0.291 | 0.53  | <0.01  |
|                        |                | uracil                                      | 0.72  | <0.01 | 0.59  | <0.01  |
|                        |                | pseudouridine                               | 0.72  | <0.01 | 0.57  | 0.023  |
|                        |                | 5-methyluridine (ribothymidine)             | 0.61  | <0.01 | 0.85  | 0.182  |
|                        |                | 2'-deoxyuridine                             | 0.32  | <0.01 | 0.32  | <0.01  |
|                        |                | beta-alanine                                | 1     | 0.985 | 1.3   | 0.031  |
| Pyrimidine Metabolism, |                | cytidine triphosphate                       | 4.3   | <0.01 | 1.88  | 0.135  |
| Cytidine containing    |                | cytidine diphosphate                        | 5.09  | <0.01 | 3.12  | <0.01  |
|                        |                | cytidine 5'-monophosphate (5'-CMP)          | 0.71  | <0.01 | 0.52  | <0.01  |
|                        |                | cytidine 2',3'-cyclic monophosphate         | 1     |       | 1     |        |
|                        |                | cytidine                                    | 0.7   | 0.062 | 0.33  | <0.01  |
|                        |                | 3-methylcytidine                            | 0.77  | 0.016 | 0.61  | <0.01  |
|                        |                | 5-methylcytidine                            | 1     |       | 1     |        |
|                        |                | 2'-deoxycytidine 5'-monophosphate           | 0.46  | <0.01 | 0.5   | <0.01  |
|                        |                | 2'-deoxycytidine                            | 0.55  | 0.025 | 0.55  | 0.025  |
| Pyrimidine Metabolism, |                | thymidine 5'-monophosphate                  | 0.39  | <0.01 | 0.49  | <0.01  |
| Thymine containing     |                | thymidine                                   | 0.61  | 0.090 | 0.44  | <0.01  |
|                        |                | thymine                                     | 0.52  | <0.01 | 0.95  | 0.563  |
|                        |                | 3-aminoisobutyrate                          | 1.09  | 0.879 | 0.82  | 0.442  |
| Purine and Pyrimidine  |                | methylphosphate                             | 0.61  | 0.032 | 0.39  | <0.01  |
| Metabolism             |                |                                             |       |       |       |        |
| Cofactors and          | Nicotinate and | nicotinate ribonucleoside                   | 2.77  | <0.01 | 2.3   | <0.01  |
| Vitamins               | Nicotinamide   | nicotinamide                                | 0.97  | 0.531 | 0.85  | 0.028  |
|                        | Metabolism     | nicotinamide ribonucleotide (NMN)           | 3.56  | <0.01 | 2.59  | <0.01  |

*Continued on the next page*

Supplementary Table S1. *Continued.*

|                                     |                                                       |      |       |      |       |
|-------------------------------------|-------------------------------------------------------|------|-------|------|-------|
|                                     | nicotinamide riboside                                 | 7.87 | <0.01 | 7.89 | <0.01 |
|                                     | nicotinamide adenine dinucleotide (NAD <sup>+</sup> ) | 3.29 | <0.01 | 4.06 | <0.01 |
|                                     | nicotinamide adenine dinucleotide reduced (NADH)      | 1.47 | 0.384 | 2.61 | <0.01 |
|                                     | nicotinate adenine dinucleotide (NAAD <sup>+</sup> )  | 1.18 | 0.448 | 0.73 | <0.01 |
|                                     | 1-methylnicotinamide                                  | 1    |       | 1    |       |
|                                     | trigonelline (N <sup>1</sup> -methylnicotinate)       | 0.52 | <0.01 | 0.92 | 0.613 |
|                                     | adenosine 5'-diphosphoribose (ADP-ribose)             | 2.97 | <0.01 | 4.5  | <0.01 |
| Riboflavin Metabolism               | riboflavin (Vitamin B2)                               | 1.45 | 0.036 | 1.06 | 0.582 |
|                                     | flavin adenine dinucleotide (FAD)                     | 0.91 | 0.217 | 0.74 | 0.033 |
|                                     | flavin mononucleotide (FMN)                           | 1.46 | <0.01 | 0.88 | 0.403 |
| Pantothenate and CoA Metabolism     | pantothenate                                          | 1.41 | <0.01 | 1.69 | <0.01 |
|                                     | phosphopantetheine                                    | 2.81 | <0.01 | 2.27 | <0.01 |
|                                     | 3'-dephosphocoenzyme A                                | 0.55 | <0.01 | 0.65 | 0.063 |
|                                     | coenzyme A                                            | 1.24 | 0.051 | 1.24 | 0.078 |
| Ascorbate and Aldarate Metabolism   | threonate                                             | 0.79 | 0.803 | 1.13 | 0.486 |
|                                     | gulonic acid                                          | 3.4  | <0.01 | 4.25 | <0.01 |
| Tocopherol Metabolism               | alpha-tocopherol                                      | 2.3  | <0.01 | 2.29 | <0.01 |
| Biotin Metabolism                   | biotin                                                | 3.67 | <0.01 | 4.69 | <0.01 |
| Folate Metabolism                   | 5-methyltetrahydrofolate (5MeTHF)                     | 0.04 | <0.01 | 0.14 | <0.01 |
| Tetrahydrobiopterin Metabolism      | biopterin                                             | 0.74 | 0.081 | 0.56 | <0.01 |
|                                     | dihydrobiopterin                                      | 1.39 | 0.012 | 1.26 | 0.072 |
| Pterin Metabolism                   | pterin                                                | 0.9  | 0.588 | 0.74 | 0.165 |
| Hemoglobin and Porphyrin Metabolism | bilirubin                                             | 1    |       | 1    |       |
| Thiamine Metabolism                 | thiamin (Vitamin B1)                                  | 0.7  | <0.01 | 0.64 | 0.014 |
|                                     | thiamin monophosphate                                 | 0.88 | 0.166 | 0.78 | 0.181 |
|                                     | thiamin diphosphate                                   | 1.03 | 0.867 | 1.15 | 0.240 |
| Vitamin A Metabolism                | retinol (Vitamin A)                                   | 1.13 | 0.056 | 0.97 | 0.672 |
| Vitamin B6 Metabolism               | pyridoxine (Vitamin B6)                               | 1.53 | 0.089 | 1.56 | 0.107 |
|                                     | pyridoxamine                                          | 0.25 | <0.01 | 0.23 | <0.01 |
|                                     | pyridoxamine phosphate                                | 0.03 | <0.01 | 0.04 | <0.01 |
|                                     | pyridoxal phosphate                                   | 0.7  | 0.079 | 0.7  | 0.079 |
|                                     | pyridoxal                                             | 0.32 | <0.01 | 0.21 | <0.01 |
|                                     | pyridoxate                                            | 0.75 | 0.391 | 2.93 | 0.436 |
| Xenobiotics                         | hippurate                                             | 1.79 | <0.01 | 2.01 | <0.01 |
|                                     | O-methylcatechol sulfate                              | 0.76 | 0.236 | 0.62 | 0.100 |
| Food Component/Plant                | gluconate                                             | 4.34 | <0.01 | 5.73 | <0.01 |
|                                     | ergothioneine                                         | 1.45 | 0.112 | 1.29 | 0.182 |
|                                     | erythritol                                            | 1.17 | 0.066 | 1.53 | 0.031 |
|                                     | N-glycolylneuraminatate                               | 0.85 | 0.378 | 1.01 | 0.782 |
|                                     | stachydrine                                           | 0.81 | 0.040 | 0.83 | 0.048 |
| Drug                                | penicillin G                                          | 1    |       | 1    |       |
|                                     | O-sulfo-L-tyrosine                                    | 0.82 | 0.066 | 0.89 | 0.234 |
| Chemical                            | lanthionine                                           | 0.31 | <0.01 | 0.27 | <0.01 |
|                                     | phenol red                                            | 1.66 | <0.01 | 1.62 | <0.01 |
